# Supplementary material for: Revealing the Antiepileptic Effect of α-Asaronol on Pentylenetetrazole-Induced Seizure Rats Using NMR-Based Metabolomics
Source: PubMed Central journal article supplement — ACS Omega. 2022 Feb 9;7(7):6322–34. doi: 10.1021/acsomega.1c06922 (PMC8867478; doi:10.1021/acsomega.1c06922), 2022-02-09
Supplement: ao1c06922_si_001.pdf [file ao1c06922_si_001.pdf]

*Supporting information for*

**Revealing antiepileptic effect of  $\alpha$ -asaronol on pentylenetetrazole-induced seizure rat using  
NMR-based metabolomics**

Xue Zhao, Lihong Liang, Ru Xu, Peixuan Cheng, Pu Jia, Yajun Bai, Yajun Zhang, Xinfeng Zhao,  
Xiaohui Zheng and Chaoni Xiao\*

The College of Life Sciences, Northwest University, Xi'an 710069, PR China.

\*Corresponding author: Chaoni Xiao

Tel: +86-29-88302686

Fax: +86-29-88302686

E-mail: xiaochaoni@nwu.edu.cn

**Table S1.** OPLS-DA correlation coefficients for metabolites in control (Con), PTZ-induced group (M),  $\alpha$ -asaronol-treated group (NOL) and  $\alpha$ -asarone-treated group (ONE)

| Metabolite            | Plasma  |       |       | Brain tissue extract |        |       |
|-----------------------|---------|-------|-------|----------------------|--------|-------|
|                       | M / Con | NOL/M | ONE/M | M / Con              | NOL/ M | ONE/M |
| 3-Hydroxybutyrate     | -0.64   | —     | 0.90  |                      |        |       |
| Threonine             | 0.55    |       | -0.80 | -0.56                | 0.58   | 0.59  |
| Myo-inositol          |         |       |       | -0.68                | -0.94  | 0.95  |
| GABA                  |         |       |       | -0.92                | 0.97   | 0.62  |
| O-acetyl-glycoprotein | 0.55    | —     | -0.77 |                      |        |       |
| $\alpha$ -Glucose     | 0.57    | -0.80 | -0.74 |                      |        |       |
| $\beta$ -Glucose      | 0.53    | -0.69 | -0.83 |                      |        |       |
| Choline               |         |       |       | 0.95                 | -0.81  | -0.95 |
| Glycine               | 0.53    | —     | 0.83  | —                    | —      | -0.74 |
| Dimethylglycine       | 0.62    | —     | -0.89 |                      |        |       |
| Leucine               | —       | 0.77  | —     | —                    | —      | —     |
| Glycerol              | —       | —     | 0.55  | -0.87                | -0.95  | 0.86  |
| Alanine               | -0.63   | 0.65  | 0.83  | 0.80                 | -0.88  | -0.95 |
| Glutamate             | —       | 0.69  | 0.67  | 0.82                 | -0.89  | -0.96 |
| Aspartate             |         |       |       | 0.93                 | -0.90  | -0.91 |
| Betaine               | 0.55    | -0.60 | -0.90 |                      |        |       |
| Lactate               | -0.50   | 0.58  | —     | 0.85                 | -0.87  | -0.91 |
| Lysine                |         |       |       | 0.83                 | -0.82  | 0.94  |
| Phosphorylcholine     |         |       |       | -0.82                | 0.83   | 0.85  |
| Glutamine             |         |       |       | -0.92                | 0.93   | 0.91  |
| N-acetyl-glycoprotein | —       | —     | -0.70 |                      |        |       |
| Taurine               | —       | 0.50  | 0.76  | 0.84                 | -0.94  | -0.97 |
| Succinate             | —       | 0.73  | —     |                      |        |       |
| Lipid                 | —       | 0.59  | 0.65  |                      |        |       |
| Isoleucine            | —       | —     | -0.66 |                      |        |       |
| Valine                | —       | 0.76  | —     | 0.75                 | -0.85  | -0.92 |
| Acetate               | —       | —     | —     | —                    | —      | -0.96 |
| Xanthosine            |         |       |       | —                    | 0.77   | 0.78  |
| Inosine               |         |       |       | 0.89                 | -0.66  | —     |

Positive and negative signs indicate positive and negative correlation in the concentrations of metabolites, respectively. The Correlation Coefficient  $|p(\text{corr})|$  of 0.50 was used as the cutoff value for the significant difference evaluation ( $p < 0.05$ ). A dash (—) indicates that metabolites did not exhibit significant changes.
